# Supplementary material for: Conceptual and quantitative categorization of wave-induced flooding impacts for pedestrians and assets in urban beaches
Source: Springer Nature journal article supplement (doi:10.1038/s41598-023-32175-6), 2023-05-04
Supplement: 41598_2023_32175_MOESM1_ESM.pdf [file 41598_2023_32175_MOESM1_ESM.pdf]

## Conceptual and quantitative categorization of wave-induced flooding impacts for pedestrians and assets in urban beaches

J. L. Garzon<sup>\*(1)</sup>, Ó. Ferreira<sup>(1)</sup>, M.T.Reis<sup>(2)</sup>, A. Ferreira<sup>(2)</sup>, C.J.E.M. Fortes<sup>(2)</sup> and A.C. Zózimo<sup>(2)</sup>

<sup>(1)</sup> CIMA – Centre for Marine and Environmental Research, FCT, Universidade do Algarve, Faro, Portugal

<sup>(2)</sup> Hydraulics and Environment Department, National Laboratory for Civil Engineering, Av. do Brasil, 101, 1700-066 Lisboa, Portugal.

### Supplementary material

**Table S1. Oceanic conditions used on the XBeach simulations.**

| <b>Costa de Caparica</b>       |        |        |                |                 |
|--------------------------------|--------|--------|----------------|-----------------|
| Storm                          | Hs (m) | Tp (s) | Direction (°N) | Water level (m) |
| Hercules                       | 4.53   | 20.0   | 270            | 2.05            |
| Emma                           | 4.15   | 10.9   | 270            | 2.22            |
| Feb2017                        | 4.69   | 16.5   | 270            | 1.21            |
| <b>Praia de Faro</b>           |        |        |                |                 |
| Storm                          | Hs (m) | Tp (s) | Direction (°N) | Water level (m) |
| Hercules, 6 <sup>th</sup>      | 1.37   | 20.5   | 240            | 0.95            |
| Hercules, 7 <sup>th</sup>      | 1.8    | 18.6   | 240            | 1.08            |
| Emma                           | 5.57   | 11.9   | 220            | 1.75            |
| Elsa                           | 4.35   | 9.8    | 230            | 1.1             |
| Barbara                        | 3.14   | 8.3    | 216            | 1.46            |
| Lola, 24 <sup>th</sup> , 11:00 | 2.95   | 14.7   | 225            | 0.51            |
| Lola, 24 <sup>th</sup> , 12:00 | 2.96   | 14.7   | 225            | 0.94            |
| Lola, 24 <sup>th</sup> , 13:00 | 2.97   | 14.7   | 224            | 1.19            |
| Lola, 24 <sup>th</sup> , 14:00 | 2.97   | 14.7   | 223            | 1.2             |
| Lola, 24 <sup>th</sup> , 15:00 | 2.95   | 14.7   | 223            | 0.97            |
| Lola, 24 <sup>th</sup> , 16:00 | 2.91   | 14.7   | 224            | 0.56            |
| Lola, 25 <sup>th</sup> , 02:00 | 2.30   | 14.7   | 229            | 1.46            |
| Lola, 25 <sup>th</sup> , 12:00 | 1.97   | 13.3   | 228            | 0.76            |
| Lola, 25 <sup>th</sup> , 13:00 | 1.93   | 13.3   | 228            | 1.23            |
| Lola, 25 <sup>th</sup> , 14:00 | 1.88   | 13.3   | 228            | 1.47            |
| Lola, 25 <sup>th</sup> , 15:00 | 1.83   | 13.3   | 228            | 1.39            |
| Lola, 25 <sup>th</sup> , 16:00 | 1.79   | 13.3   | 228            | 1.04            |

**Table S2. Minimum, maximum and mean overtopping discharges and depth velocities at CC and PdF.**

| <b>Costa de Caparica</b> |                |                            |                      |   |             |                                               |       |             |       |       |
|--------------------------|----------------|----------------------------|----------------------|---|-------------|-----------------------------------------------|-------|-------------|-------|-------|
| <b>Storm</b>             | <b>Profile</b> | <b>Assessment location</b> | <b>q (l/s per m)</b> |   |             | <b>Depth velocity (m<sup>3</sup>/s per m)</b> |       |             |       |       |
|                          |                |                            | <b>[Mix – Max]</b>   |   | <b>Mean</b> | <b>[Mix – Max]</b>                            |       | <b>Mean</b> |       |       |
| Hercules                 | CC1            | Crest                      | 3.510                | - | 5.721       | 4.549                                         | 3.870 | -           | 7.222 | 4.922 |
|                          |                | Buildings at crest         | 1.893                | - | 3.820       | 2.499                                         | 1.412 | -           | 3.536 | 2.057 |
|                          |                | Behind seawall             | 2.734                | - | 4.955       | 3.527                                         | 1.229 | -           | 4.479 | 2.308 |
| Hercules                 | CC2            | Crest                      | 0.803                | - | 3.028       | 1.460                                         | 1.753 | -           | 3.803 | 2.817 |
|                          |                | Buildings at crest         | 0.464                | - | 2.114       | 0.857                                         | 0.641 | -           | 2.159 | 1.356 |
| Emma                     | CC1            | Crest                      | 0.000                | - | 0.000       | 0.000                                         | 0.000 | -           | 0.000 | 0.000 |
|                          |                | Buildings at crest         | 0.000                | - | 0.000       | 0.000                                         | 0.000 | -           | 0.000 | 0.000 |
|                          |                | Behind seawall             | 0.000                | - | 0.000       | 0.000                                         | 0.000 | -           | 0.000 | 0.000 |
| Emma                     | CC2            | Crest                      | 0.000                | - | 0.000       | 0.000                                         | 0.000 | -           | 0.000 | 0.000 |
|                          |                | Buildings at crest         | 0.000                | - | 0.000       | 0.000                                         | 0.000 | -           | 0.000 | 0.000 |
| Feb2017                  | CC1            | Crest                      | 0.000                | - | 0.037       | 0.010                                         | 0.000 | -           | 0.402 | 0.114 |
|                          |                | Buildings at crest         | 0.000                | - | 0.000       | 0.000                                         | 0.000 | -           | 0.000 | 0.000 |
|                          |                | Behind seawall             | 0.000                | - | 0.000       | 0.000                                         | 0.000 | -           | 0.000 | 0.000 |
| Feb2017                  | CC2            | Crest                      | 0.000                | - | 0.007       | 0.001                                         | 0.000 | -           | 0.083 | 0.017 |
|                          |                | Buildings at crest         | 0.000                | - | 0.000       | 0.000                                         | 0.000 | -           | 0.000 | 0.000 |

**Praia de Faro**

| <b>Storm</b>                   | <b>Assessment location</b> | <b>q (l/s per m)</b> |   |             | <b>Depth velocity (m<sup>3</sup>/s per m)</b> |       |             |       |       |
|--------------------------------|----------------------------|----------------------|---|-------------|-----------------------------------------------|-------|-------------|-------|-------|
|                                |                            | <b>[Mix – Max]</b>   |   | <b>Mean</b> | <b>[Mix – Max]</b>                            |       | <b>Mean</b> |       |       |
| Hercules, 6 <sup>th</sup>      | Promenade                  | 0.000                | - | 0.200       | 0.054                                         | 0.010 | -           | 0.490 | 0.136 |
|                                | Park/Buildings             | 0.000                | - | 0.170       | 0.036                                         | 0.000 | -           | 0.280 | 0.062 |
| Hercules, 7 <sup>th</sup>      | Promenade                  | 0.010                | - | 0.710       | 0.324                                         | 0.040 | -           | 0.700 | 0.466 |
|                                | Park/Buildings             | 0.000                | - | 0.600       | 0.272                                         | 0.000 | -           | 0.410 | 0.260 |
| Emma                           | Promenade                  | 12.632               | - | 16.431      | 14.765                                        | 2.698 | -           | 4.132 | 3.596 |
|                                | Park/Buildings             | 11.449               | - | 15.140      | 13.610                                        | 2.637 | -           | 4.321 | 3.554 |
| Elsa                           | Promenade                  | 0.078                | - | 0.405       | 0.199                                         | 0.207 | -           | 0.721 | 0.431 |
|                                | Park/Buildings             | 0.051                | - | 0.349       | 0.160                                         | 0.081 | -           | 0.400 | 0.229 |
| Barbara                        | Promenade                  | 0.000                | - | 0.000       | 0.000                                         | 0.000 | -           | 0.000 | 0.000 |
|                                | Park/Buildings             | 0.000                | - | 0.000       | 0.000                                         | 0.000 | -           | 0.000 | 0.000 |
| Lola, 24 <sup>th</sup> , 11:00 | Promenade                  | 0.000                | - | 0.000       | 0.000                                         | 0.000 | -           | 0.000 | 0.000 |
|                                | Park/Buildings             | 0.000                | - | 0.000       | 0.000                                         | 0.000 | -           | 0.000 | 0.000 |
| Lola, 24 <sup>th</sup> , 12:00 | Promenade                  | 0.060                | - | 0.201       | 0.141                                         | 0.156 | -           | 0.586 | 0.342 |
|                                | Park/Buildings             | 0.009                | - | 0.157       | 0.101                                         | 0.022 | -           | 0.352 | 0.164 |
| Lola, 24 <sup>th</sup> , 13:00 | Promenade                  | 0.069                | - | 1.524       | 0.770                                         | 0.176 | -           | 1.633 | 0.964 |
|                                | Park/Buildings             | 0.539                | - | 1.333       | 0.844                                         | 0.055 | -           | 1.044 | 0.585 |
| Lola, 24 <sup>th</sup> , 14:00 | Promenade                  | 0.244                | - | 1.209       | 0.625                                         | 0.341 | -           | 1.149 | 0.754 |
|                                | Park/Buildings             | 0.136                | - | 1.076       | 0.486                                         | 0.146 | -           | 0.805 | 0.409 |
| Lola, 24 <sup>th</sup> , 15:00 | Promenade                  | 0.000                | - | 0.225       | 0.066                                         | 0.000 | -           | 0.352 | 0.122 |
|                                | Park/Buildings             | 0.000                | - | 0.173       | 0.045                                         | 0.000 | -           | 0.195 | 0.053 |
| Lola, 24 <sup>th</sup> , 16:00 | Promenade                  | 0.000                | - | 0.000       | 0.000                                         | 0.000 | -           | 0.000 | 0.000 |
|                                | Park/Buildings             | 0.000                | - | 0.000       | 0.000                                         | 0.000 | -           | 0.000 | 0.000 |
| Lola, 25 <sup>th</sup> , 02:00 | Promenade                  | 1.031                | - | 1.934       | 1.553                                         | 0.649 | -           | 2.339 | 1.163 |
|                                | Park/Buildings             | 0.842                | - | 1.665       | 1.323                                         | 0.374 | -           | 1.850 | 0.798 |
| Lola, 25 <sup>th</sup> , 12:00 | Promenade                  | 0.000                | - | 0.000       | 0.000                                         | 0.000 | -           | 0.000 | 0.000 |

|                                |                |       |   |       |       |       |   |       |       |
|--------------------------------|----------------|-------|---|-------|-------|-------|---|-------|-------|
|                                | Park/Buildings | 0.000 | - | 0.000 | 0.000 | 0.000 | - | 0.000 | 0.000 |
| Lola, 25 <sup>th</sup> , 13:00 | Promenade      | 0.000 | - | 0.067 | 0.013 | 0.000 | - | 0.116 | 0.023 |
|                                | Park/Buildings | 0.000 | - | 0.033 | 0.007 | 0.000 | - | 0.028 | 0.006 |
| Lola, 25 <sup>th</sup> , 14:00 | Promenade      | 0.038 | - | 0.365 | 0.153 | 0.111 | - | 0.435 | 0.285 |
|                                | Park/Buildings | 0.016 | - | 0.275 | 0.104 | 0.028 | - | 0.229 | 0.135 |
| Lola, 25 <sup>th</sup> , 15:00 | Promenade      | 0.000 | - | 0.002 | 0.000 | 0.000 | - | 0.007 | 0.001 |
|                                | Park/Buildings | 0.000 | - | 0.000 | 0.000 | 0.000 | - | 0.000 | 0.000 |
| Lola, 25 <sup>th</sup> , 16:00 | Promenade      | 0.000 | - | 0.000 | 0.000 | 0.000 | - | 0.000 | 0.000 |
|                                | Park/Buildings | 0.000 | - | 0.000 | 0.000 | 0.000 | - | 0.000 | 0.000 |

**Table S3. Adapted from CEM, HIDRALERTA and EurOtop 2018. Mean discharge limits in l/s per m.**

| Aware pedestrians at the seawall crest/promenade       |                                     |                   |                                    |                                    |                                       |                                  |                                       |                      |
|--------------------------------------------------------|-------------------------------------|-------------------|------------------------------------|------------------------------------|---------------------------------------|----------------------------------|---------------------------------------|----------------------|
| CEM                                                    |                                     |                   |                                    | HIDRALERTA (based on EurOtop 2007) |                                       |                                  |                                       | EurOtop 2018         |
| <i>Not uncomfortable</i>                               | <i>Uncomfortable</i>                | <i>Dangerous</i>  | <i>Very dangerous</i>              | <i>No injuries</i>                 | <i>Single minor injury</i>            | <i>Multiple minor injuries</i>   | <i>Serious injuries or fatalities</i> | <i>Not tolerable</i> |
| <0.004                                                 | [0.004 - 0.03[                      | [0.03 - 1[        | ≥ 1                                | <0.1                               | [0.1 - 0.3[                           | [0.3 - 1.0[                      | ≥ 1                                   | > 0.3 / 1 / 10*      |
| Urban components & buildings                           |                                     |                   |                                    |                                    |                                       |                                  |                                       |                      |
| CEM                                                    |                                     |                   | HIDRALERTA (based on EurOtop 2007) |                                    |                                       |                                  | EurOtop 2018                          |                      |
| No damage                                              | Minor damage                        | Structural damage | <i>No damage</i>                   | <i>Minor damage</i>                | <i>Non-structural moderate damage</i> | <i>Serious structural damage</i> | <i>Non-tolerable</i>                  |                      |
| <0.001                                                 | [0.001 - 0.03[                      | ≥ 0.03            | <0.1                               | [0.1 - 0.4[                        | [0.4 - 1.0[                           | ≥ 1                              | ≥ 1                                   |                      |
| Unaware pedestrians behind the seawall crest/promenade |                                     |                   |                                    |                                    |                                       |                                  |                                       |                      |
| CEM                                                    |                                     |                   |                                    | HIDRALERTA                         |                                       |                                  |                                       | EurOtop 2018         |
| <i>Not uncomfortable</i>                               | <i>Uncomfortable</i>                | <i>Dangerous</i>  | <i>Very dangerous</i>              | <i>No injuries</i>                 | <i>Single minor injury</i>            | <i>Multiple minor injuries</i>   | <i>Serious injuries or fatalities</i> | <i>Not tolerable</i> |
| <0.004                                                 | [0.004 - 0.03[                      | [0.03 - 1[        | ≥1                                 | <0.03                              | [0.03 - 0.09[                         | [0.09 - 0.3[                     | ≥0.3                                  | > 0.3 / 1 / 10*      |
| Vehicles (low speed)                                   |                                     |                   |                                    |                                    |                                       |                                  |                                       |                      |
| CEM                                                    |                                     |                   | HIDRALERTA (low speed)             |                                    |                                       |                                  | EurOtop 2018                          |                      |
| Safe at all speeds                                     | Unsafe at any speed and when parked |                   | <i>No damage</i>                   | <i>Minor damage</i>                | Serius damage                         | Extreme damage                   | <i>Non-tolerable</i>                  |                      |
| <0.001                                                 | ≥0.02                               |                   | < 10                               | [10 - 25 [                         | [25 - 50 [                            | ≥50                              | ≥ 5 / 10 / 75*                        |                      |

\* Values corresponding to sea states with  $H_{m0} \geq 3 \text{ m} / 2 \text{ m} \leq H_{m0} < 3 \text{ m} / 1 \text{ m} \leq H_{m0} < 2 \text{ m}$

**Table S4. Depth velocity in m<sup>3</sup>/s per m adapted from FLOODsite**

| Pedestrians                |                                                   |                           |                                               |
|----------------------------|---------------------------------------------------|---------------------------|-----------------------------------------------|
| Low caution                | Vulnerable people (e.g. children and the elderly) | Highly dangerous for most | Extremely dangerous for all                   |
| <0.25                      | [0.25 - 0.50[                                     | [0.5 - 1.1[               | ≥1.1                                          |
| Vehicles                   |                                                   |                           |                                               |
| Low caution                | Unstable                                          |                           | Stall and unstable                            |
| <0.25                      | [0.25 - 0.50[                                     |                           | ≥0.5                                          |
| Buildings                  |                                                   |                           |                                               |
| Unlikely structural damage | Possible structural damage                        |                           | Serious structural damage/Building collapsing |
| <1.1                       | [1.1 - 7[                                         |                           | ≥7                                            |
